# Supplementary material for: Phytochelatin Synthase has Contrasting Effects on Cadmium and Arsenic Accumulation in Rice Grains
Source: PubMed Central journal article supplement (PMC5914395; doi:10.1093/pcp/pcx114), 2017-08-14
Supplement: pcp-2017-e-00286-file008_pcx114.pdf [file pcp-2017-e-00286-file008_pcx114.pdf]

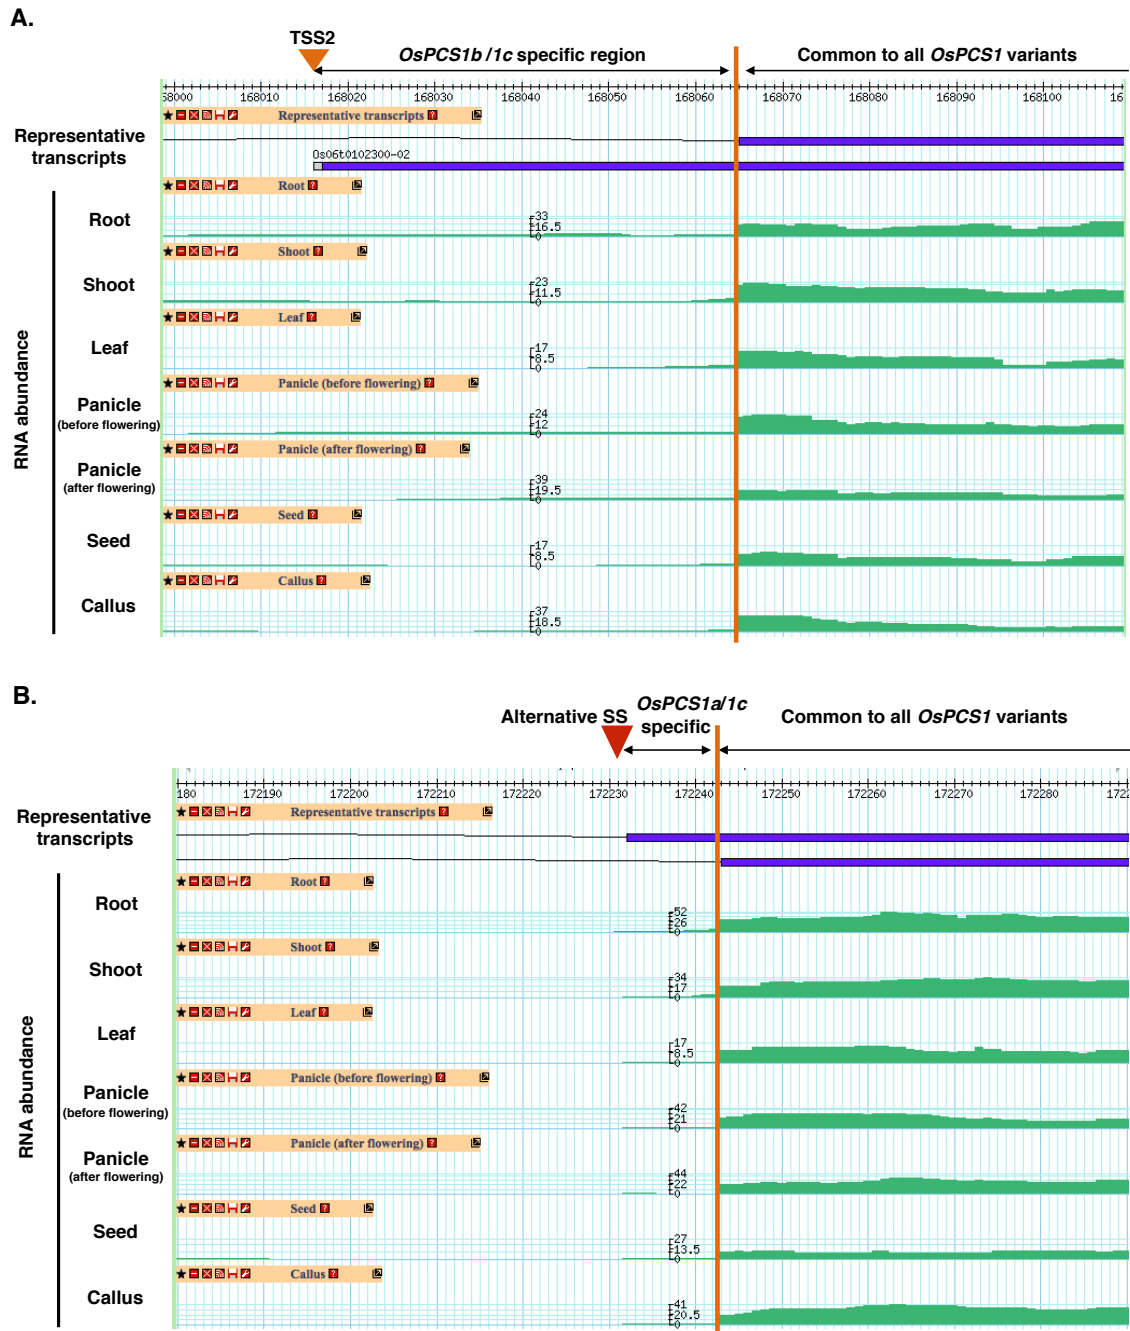

**Supplementary Figure S1. Genomic and transcriptional situation of *OsPCS1* locus (*Os6g0102300/LOC\_Os6g01260*).** Original images were captured from the RAP-DB database showing transcript abundance of *OsPCS1* in various rice tissues and callus. A, Transcript abundance in the region starting from TSS2 (predicted secondary transcript starting site specific to *OsPCS1b/1c*, Fig. 1A) and the flanking *OsPCS1s* common region separated by an orange line. In all tested tissues, the expression level is much lower in the

*OsPCS1b/1c* specific region than in the *OsPCS1* common region, suggesting higher expression of *OsPCS1full* and/or *OsPCS1a*. B, Transcript abundance in the 11 bp-region after the alternative splicing site (SS) specific to *OsPCS1a/1c* (Fig. 1A) and the flanking *OsPCS1s* common region separated by an orange line. The expression level is much lower in the *OsPCS1a/1c* specific region than in the *OsPCS1* common region. Taken together, these results suggest that *OsPCS1full* is a major variant with higher expression levels in various rice tissues.

```

AtPCS1      1  -----MAMASLYRRSLPSPFAIDFSSAEGNLFNLSALQKQTEGFFNLSVFOQOSEPAFCGLASLSVVLNALSIDPGRKWKGPWRWFDE
AtPCS2      1  -----MSMASLYRRSLPSPFAIDFASPEGNLFNLSALQKQTEGFFNLSVFOQOSEPAFCGLASLSVVLNALSIDPGRKWKGPWRWFDE
OsPCS2      1  MASKPSSRAESNQAAAVPSLYGRALPSPFAVEFASAEGRRLFAALQGTMOGFFNLSVFOQOSEPAFCGLASLSVVLNALSIDPGRKWKGPWRWFDE
OsPCS1a     1  -----MAMASLYRRSLPSPFAVEFASAEGRRLFAALQGTMOGFFNLSVFOQOSEPAFCGLASLSVVLNALSIDPGRKWKGPWRWFDE
OsPCS1c     1  -----MAMASLYRRSLPSPFAVEFASAEGRRLFAALQGTMOGFFNLSVFOQOSEPAFCGLASLSVVLNALSIDPGRKWKGPWRWFDE
OsPCS1full  1  -----MAMASLYRRSLPSPFAVEFASAEGRRLFAALQGTMOGFFNLSVFOQOSEPAFCGLASLSVVLNALSIDPGRKWKGPWRWFDE
OsPCS1b     1  -----MAMASLYRRSLPSPFAVEFASAEGRRLFAALQGTMOGFFNLSVFOQOSEPAFCGLASLSVVLNALSIDPGRKWKGPWRWFDE

AtPCS1      86  SMLDCCEPLEVIVKGIIFGKVVCLAHSSGAKVEAFRTSSSTLIDDFRNFVVKCSSESNCHMISTYHRGVFKQTGTGHFSPIGGYNAERDMALILDVARFK
AtPCS2      85  SMLDCCEPLEVIVKGIIFGKVVCLAHSSGAKVEAFRTSSSTLIDDFRNFVVKCSSESNCHMISTYHRGVFKQTGTGHFSPIGGYNAERDMALILDVARFK
OsPCS2     101  SMLDCCEPLEVIVKGIIFGKVVCLAHSSGAKVEAFRTSSSTLIDDFRNFVVKCSSESNCHMISTYHRGVFKQTGTGHFSPIGGYNAERDMALILDVARFK
OsPCS1a     87  SMLDCCEPLEVIVKGIIFGKVVCLAHSSGAKVEAFRTSSSTLIDDFRNFVVKCSSESNCHMISTYHRGVFKQTGTGHFSPIGGYNAERDMALILDVARFK
OsPCS1c     1  -----MALILDVARFK
OsPCS1full  87  SMLDCCEPLEVIVKGIIFGKVVCLAHSSGAKVEAFRTSSSTLIDDFRNFVVKCSSESNCHMISTYHRGVFKQTGTGHFSPIGGYNAERDMALILDVARFK
OsPCS1b     1  -----MALILDVARFK

AtPCS1     186  YPPHWVPLKLLWEAMDSIDQSTCRRRGFMLISRPHREPGLLYTVSCRDESWIETAKLREKEDVPRLVSSQHVDSVEKISVVEKSLPSNFQPHRWVAEIR
AtPCS2     185  YPPHWVPLKLLWEAMDSIDQSTCRRRGFMLISRPHREPGLLYTVSCRDESWIETAKLREKEDVPRLVSSQHVDSVEKISVVEKSLPSNFQPHRWVAEIR
OsPCS2     201  YPPHWVPLKLLWEAMNTDDATGLLRGFMILSRPHREPGLLYTVSCRDESWIETAKLREKEDVPRLVSSQHVDSVEKISVVEKSLPSNFQPHRWVAEIR
OsPCS1a     187  YPPHWVPLKLLWEAMNTDDATGLLRGFMILSRPHREPGLLYTVSCRDESWIETAKLREKEDVPRLVSSQHVDSVEKISVVEKSLPSNFQPHRWVAEIR
OsPCS1c     12  YPPHWVPLKLLWEAMNTDDATGLLRGFMILSRPHREPGLLYTVSCRDESWIETAKLREKEDVPRLVSSQHVDSVEKISVVEKSLPSNFQPHRWVAEIR
OsPCS1full  187  YPPHWVPLKLLWEAMNTDDATGLLRGFMILSRPHREPGLLYTVSCRDESWIETAKLREKEDVPRLVSSQHVDSVEKISVVEKSLPSNFQPHRWVAEIR
OsPCS1b     12  YPPHWVPLKLLWEAMNTDDATGLLRGFMILSRPHREPGLLYTVSCRDESWIETAKLREKEDVPRLVSSQHVDSVEKISVVEKSLPSNFQPHRWVAEIR

AtPCS1     286  ITEDSNQNLSESEKSLKLLKQELKQVQEGKLLKRVDFK-----LSTVGYEDSLIYAKAKAGQGLLETISG--SPSKEKGCCHLGVVCKKGPDPDISE
AtPCS2     285  ITEDSNQNLSESEKSLKLLKQELKQVQEGKLLKRVDFK-----LSSV-YEDNLFYAAKVVQDGELETISG--YESDSECCNEKCVKCKKGLGEEK
OsPCS2      -----
OsPCS1a     -----
OsPCS1c     -----
OsPCS1full  287  HQSEGGSGLSSESEKSLKLLKQELKQVQEGKLLKRVDFKRLVRELQFTKQPCCSCSYSSDDDSFRRHAAASVCCQGAALLTGNLSSKRDGFCCHREKCFKCVQVDDGDP
OsPCS1b     112  HQSEGGSGLSSESEKSLKLLKQELKQVQEGKLLKRVDFKRLVRELQFTKQPCCSCSYSSDDDSFRRHAAASVCCQGAALLTGNLSSKRDGFCCHREKCFKCVQVDDGDP

AtPCS1     375  GVVVTCVVVRDGNKQVLLVPSQTQCECGPEAT-----YFAGNDVFNALLALPQGNWSGIKDQAMHBMKOLISMASPTLMOEVLHLRRQLQLL
AtPCS2     373  VVVVA-----YFAGNDVFNALLALPQGNWSGIKDQAMHBMKOLISMASPTLMOEVLHLRRQLQLL
OsPCS2      -----
OsPCS1a     -----
OsPCS1c     -----
OsPCS1full  387  KLVVTCVAVSGVNEQSDVMDLPISTLSTVVCNSNSSEVVKVPSRTDILVLLALHPSNHWGIKDERKAEFQSLSTDIHDDDKRREHLHLRRQLHYV
OsPCS1b     212  KLVVTCVAVSGVNEQSDVMDLPISTLSTVVCNSNSSEVVKVPSRTDILVLLALHPSNHWGIKDERKAEFQSLSTDIHDDDKRREHLHLRRQLHYV

AtPCS1     469  KRQENKEEDDLAAPAY
AtPCS2     437  KRQENKEEDDLSAPA-
OsPCS2      -----
OsPCS1a     -----
OsPCS1c     -----
OsPCS1full  487  RSKREYGDVVPQSH-
OsPCS1b     312  RSKREYGDVVPQSH-

```

Supplementary Figure S2. Alignment of rice and Arabidopsis PCS amino acid sequences.

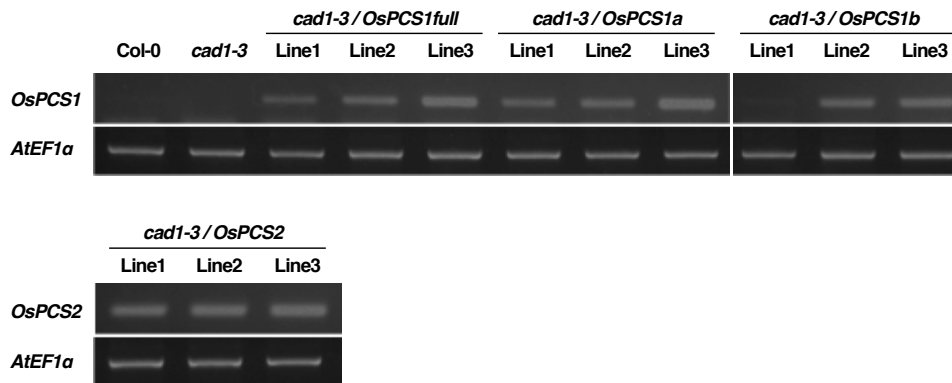

**Supplementary Figure S3. Expression analyses of *OsPCS* transgenes in the *Arabidopsis* transgenic plants by RT-PCR.**

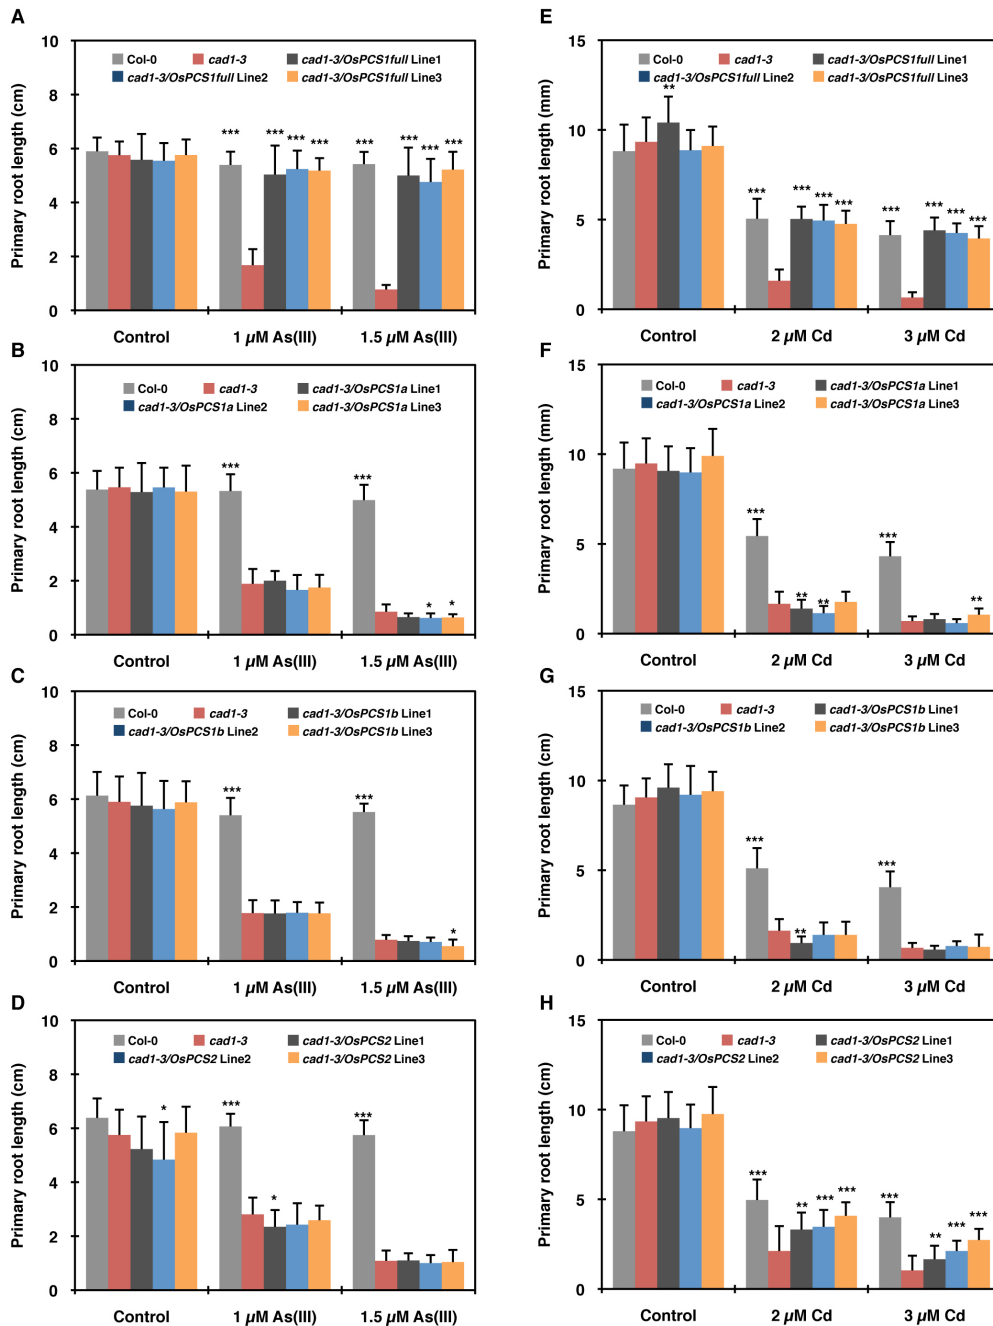

**Supplementary Figure S4. As and Cd sensitivity assay of the Arabidopsis plants harboring *OsPCS* transgenes.** Primary root lengths were measured after 12 d cultivation on the agar plates containing As(III) (A to D) or Cd (E to H). A and E, *cad1-3/OsPCS1full*. B and F, *cad1-3/OsPCS1a*. C and G, *cad1-3/OsPCS1b*. D and H, *cad1-3/OsPCS2*. Data represent means with SD of two independent experiments ( $n = 13 - 25$ ). Asterisks indicate significant differences from *cad1-3* within each treatment (\*  $p < 0.05$ , \*\*  $p < 0.01$ , \*\*\*  $p < 0.001$ ; *t*-test).

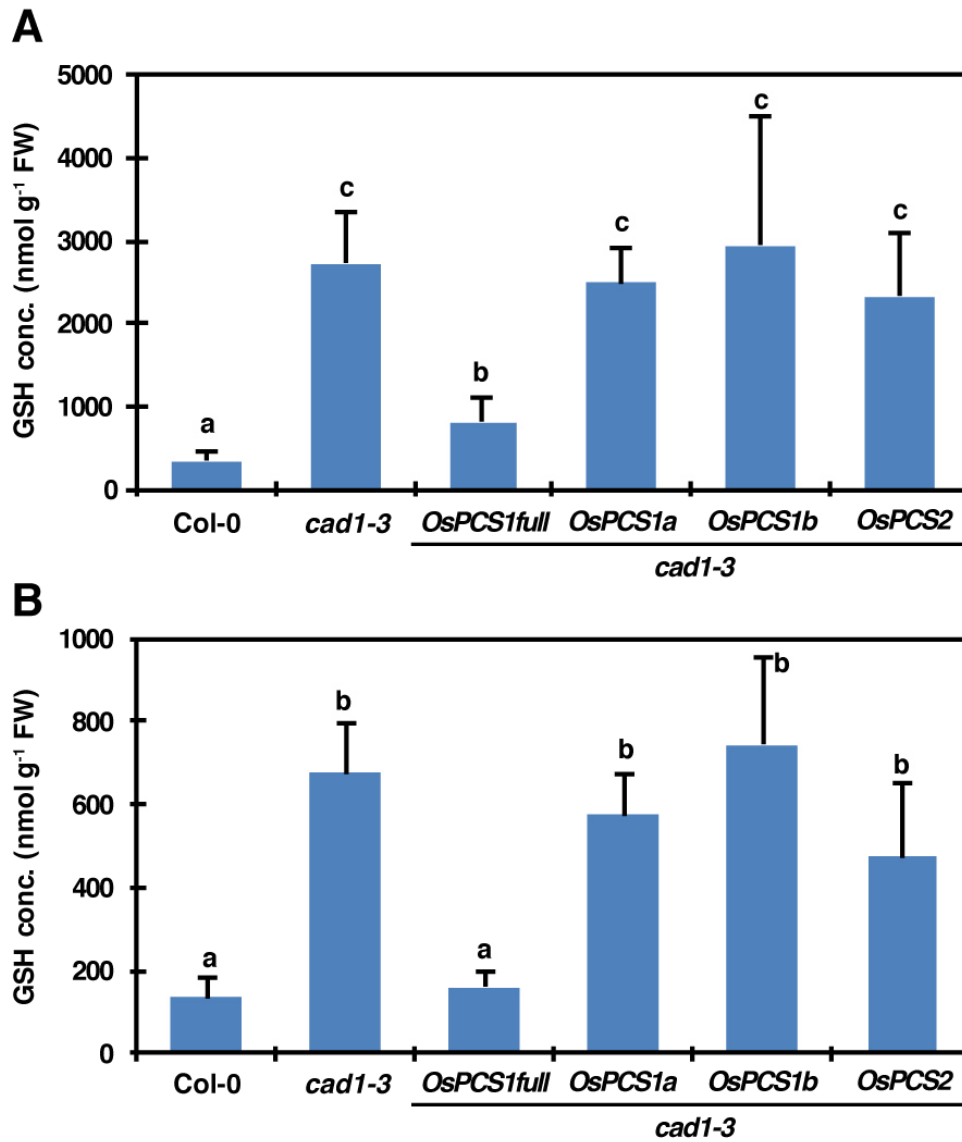

**Supplementary Figure S5.** GSH concentrations in roots of Col-0, *cad1-3* and *cad1-3* transgenic plants with *OsPCS* exposed to As(III) (A) or Cd (B). 7 d old seedlings were transferred from the control medium to the medium containing 5 $\mu$ M As(III) or 5 $\mu$ M Cd and grown for 7 d before harvest. Data represent means with SD of two independent experiments (n = 3 - 4). Means sharing the same lowercase (PC2) and uppercase (PC3) letter are not significantly different ( $p < 0.05$ , Tukey's HSD).

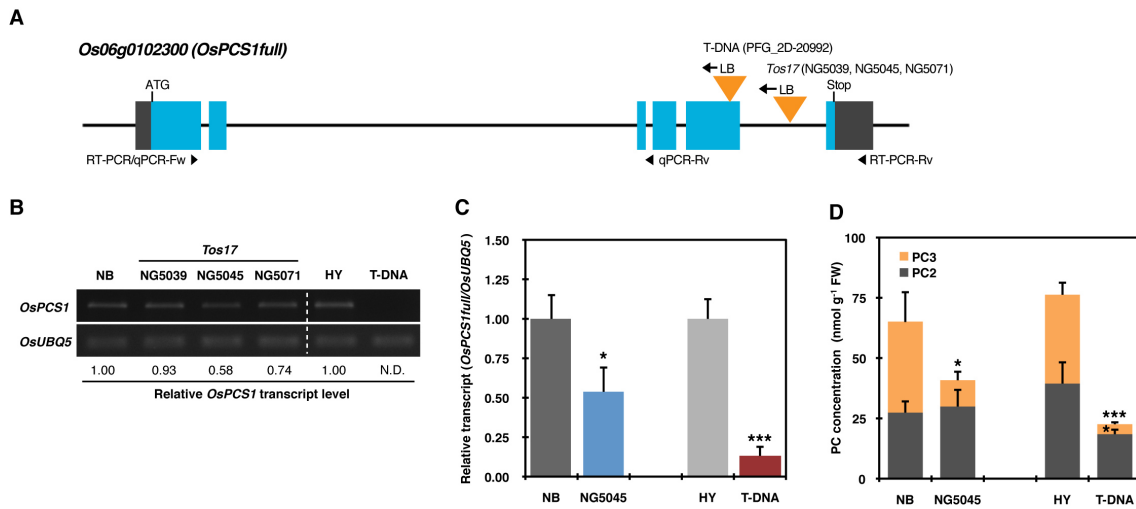

**Supplementary Figure S6. Characterization of *OsPCS1* mutant rice.** A, Insertion sites of T-DNA and *Tos17* in *Os06g0102300* (*OsPCS1full*). Black and blue boxes represent untranslated regions and coding regions, respectively. B and C, *OsPCS1* expression analyses in the wild-type and mutant plants by RT-PCR (B) and quantitative real-time PCR (C). D, PCs concentrations in the rice roots exposed to 10 $\mu$ M Cd for 3 d. C and D, Data represent means with SD of at least three biological replicates. Asterisks indicate significant differences from each wild-type line (\*  $p < 0.05$ , \*\*  $p < 0.01$ , \*\*\*  $p < 0.001$ ; *t*-test).

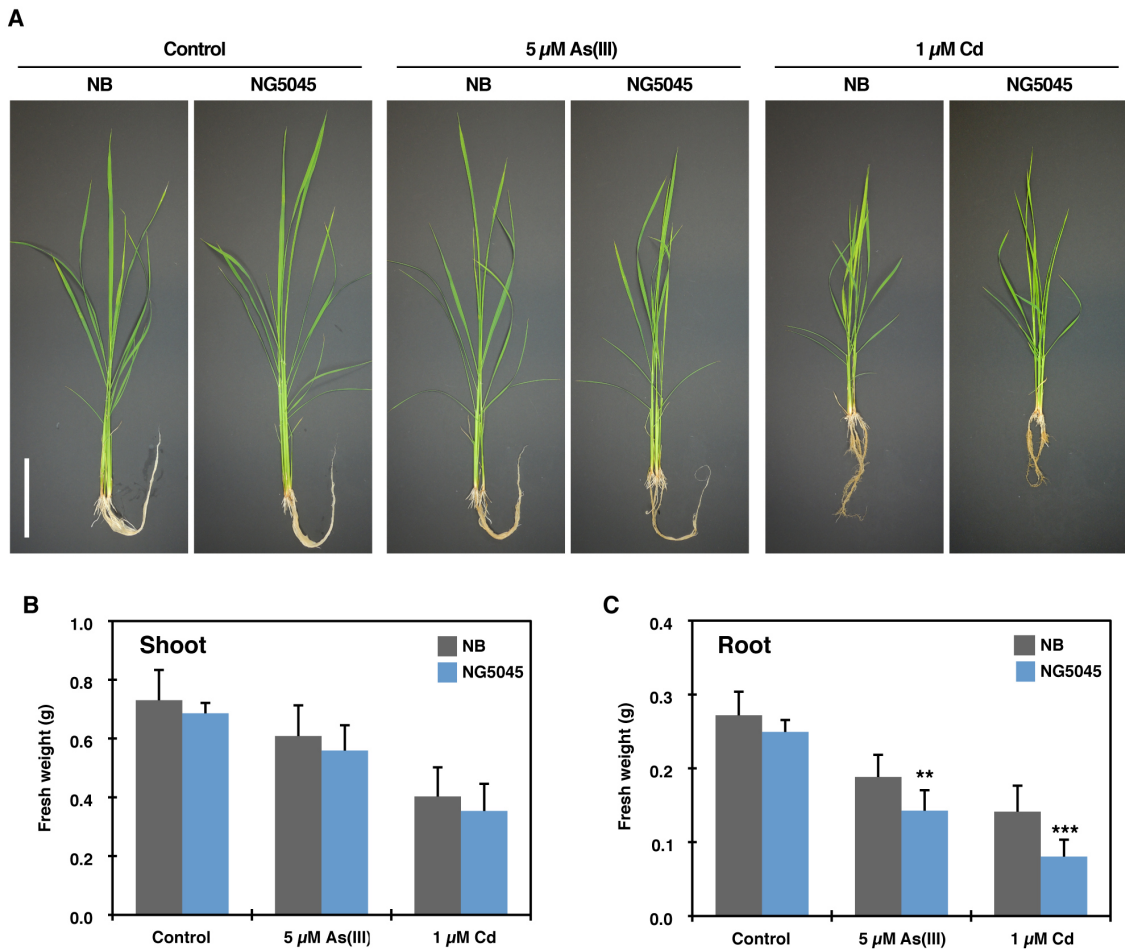

**Supplementary Figure S7. As and Cd sensitivity assay of the *Tos17* insertion rice.** A to C, the wild-type NB and *Tos17* mutant of *OsPCS1* (NG5045) were hydroponically grown for 2 weeks without As(III) or Cd addition and then grown further for 3 weeks with or without 5  $\mu$ M As(III) or 1  $\mu$ M Cd. A, Phenotypes of the NB and NG5045 after cultivation. A white bar = 10cm. B and C, Fresh weight of shoot (B) and root (C) after cultivation. Data represent means with SD of two independent experiments ( $n = 6 - 10$ ). Asterisks indicate significant differences from the wild-type NB (\*\*  $p < 0.01$ , \*\*\*  $p < 0.001$ ;  $t$ -test).



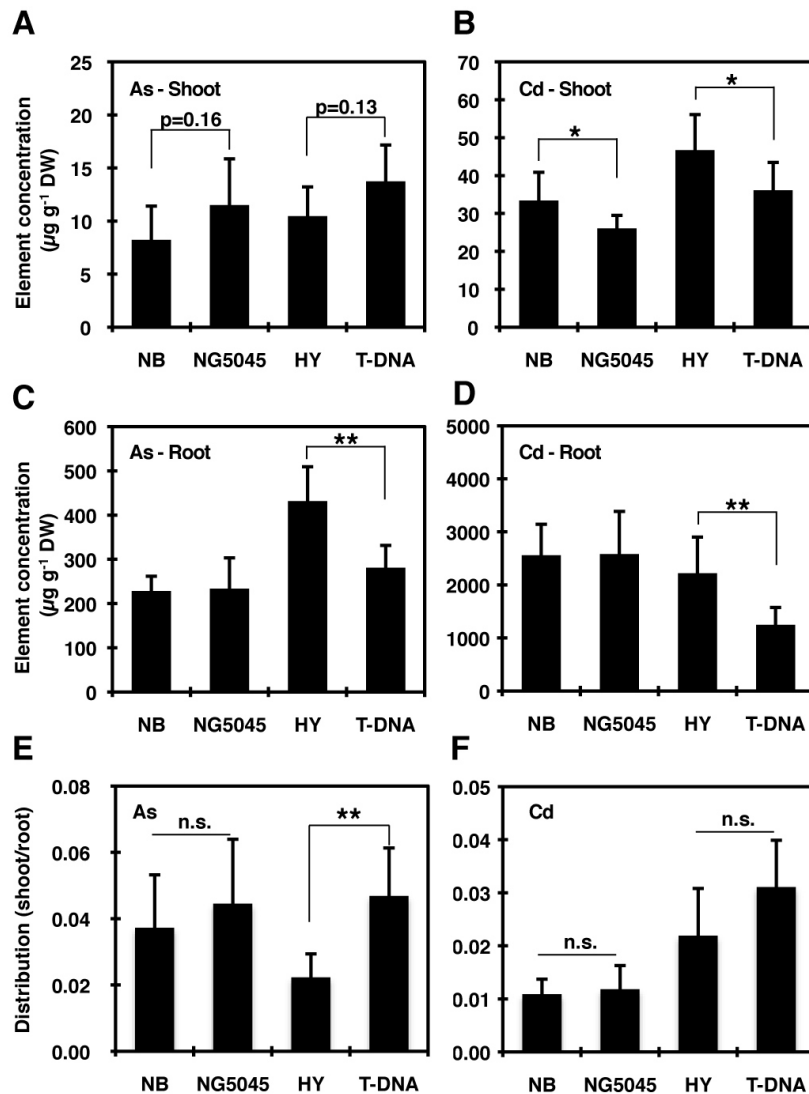

**Supplementary Figure S8. As and Cd accumulation in the hydroponically grown *OsPCS1* mutant rice and the respective wild-type plants.** A to F, The wild-type and *OsPCS1* mutant rice were hydroponically grown for 2 weeks without As(III) or Cd addition and then grown further for 3 weeks with or without 5  $\mu\text{M}$  As(III) or 1  $\mu\text{M}$  Cd. A, As concentration in shoot. B, Cd concentration in shoot. C, As concentration in root. D, Cd concentration in root. E, As distribution ratio. E, Cd distribution ratio. Data represent means with SD of two independent experiments ( $n = 6 - 8$ ). Asterisks indicate significant differences between each wild-type and mutant pair (\*  $p < 0.05$ , \*\*  $p < 0.01$ ; *t*-test).

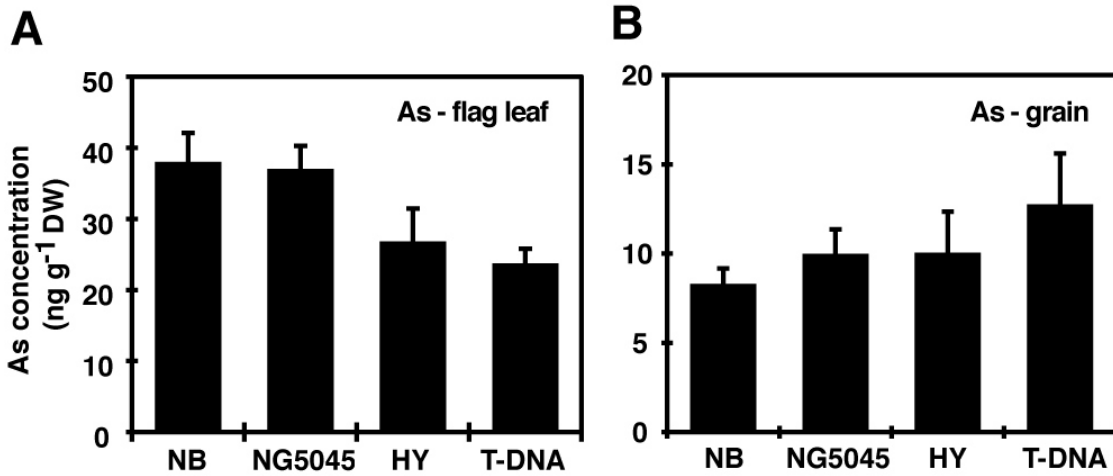

**Supplemental Figure S9. As concentrations in *OsPCS1* mutant rice and the respective wild-type plants grown under intermittent water conditions.** The wild-type and *OsPCS1* mutant rice were grown in pots until grain ripening. After harvest, element concentrations in leaf blade and brown rice were measured by ICP-MS. A and B, As concentrations in flag leaf blade (A) and grain (B). Data represent means with SD of two independent experiments (n = 11 - 12).



**Supplemental Table S1 List of primers used in the study**

| Primer set for                                    | Primer name                          | Primer sequence (5' to 3')                                                    |
|---------------------------------------------------|--------------------------------------|-------------------------------------------------------------------------------|
| Cloning of <i>OsPCS1</i> cDNA                     | OsPCS1full/a 5'UTR Fwd               | TCGAGTGCAAGAAGAGGAAAGC                                                        |
|                                                   | OsPCS1b/c 5'UTR Fwd                  | CATTGCATTGCATTTTCAGAC                                                         |
|                                                   | OsPCS1 3'UTR Rev                     | CTTTTGAAGGACACCAGCC                                                           |
| Cloning of <i>OsPCS2</i> cDNA                     | OsPCS2 Fwd                           | ATGGCGTCTAAACCAAGCAG                                                          |
|                                                   | OsPCS2 3'UTR Rev                     | CCAGCATTGGGAGGAAGATG                                                          |
| Plasmid construction for Arabidopsis transformant | ProAtPCS1 HindIII Fwd                | ccCAAGCTTCTCATGTTTATTGAAC                                                     |
|                                                   | ProAtPCS1 KpnI Rev                   | ggggtaccTTTTCACTGCTTGTITTTGGT                                                 |
|                                                   | OsPCS1full/a KpnI Fwd                | ggggtaccATGGCAGCGATGGCATCCCT                                                  |
|                                                   | OsPCS1full/b PacI Rev                | ccttaattaaTTAATGGGATTGTGGCACAG                                                |
|                                                   | OsPCS1b/c KpnI Fwd                   | ggggtaccATGGCGCTTATCCTGGATGTC                                                 |
|                                                   | OsPCS1a/c PacI Rev                   | ccttaattaaCTACTCTCATCCTTAAGAAG                                                |
|                                                   | sGFP KpnI Fwd<br>sGFP PacI Rev       | ggggtaccATGGTGAGCAAGGGCGAGG<br>ccttaattaaTTACTTGTACAGCTCGTCCATGCC             |
| Plasmid construction for yeast transformation     | OsPCS1full/a XhoI Fwd                | ccgctcgagATGGCAGCGATGGCATCCCT                                                 |
|                                                   | OsPCS1b/c XhoI Fwd                   | ccgctcgagATGGCGCTTATCCTGGATGT                                                 |
|                                                   | OsPCS2 XhoI Fwd                      | ccgctcgagATGGCGTCTAAACCAAGCAG                                                 |
|                                                   | OsPCS1full NotI Rev                  | ataagaatcgggcgccATGGGATTGTGGCACAG                                             |
|                                                   | OsPCS1a NotI Rev                     | ataagaatcgggcgccCACTCTCATCCTTAAGAAGATCG                                       |
|                                                   | OsPCS1b NotI Rev                     | ataagaatcgggcgccATGGGATTGTGGCACAGGAT                                          |
|                                                   | OsPCS1c NotI Rev<br>OsPCS2 NotI Rev  | ataagaatcgggcgccCACTCTCATCCTTAAGAAGATC<br>ataagaatcgggcgccATTTACCACTGCACGGATC |
| RT-PCR of Arabidopsis transgenic plants           | OsPCS1 common Fwd                    | TTCAAATACCCTCCTCACTGG                                                         |
|                                                   | OsPCS1 common Rev                    | CACTGTGTAGAGCAATGAAGGAG                                                       |
|                                                   | OsPCS2 Fwd                           | TCGCTTCAAATACCCTCCTC                                                          |
|                                                   | OsPCS2 Rev                           | TGAGATAAGCATGAACCCCC                                                          |
|                                                   | AtEF1a Fwd                           | AGCAGCTCTTCTTGCTTTC                                                           |
|                                                   | AtEF1a Rev                           | AACGCCTGTCAATCTTGGTC                                                          |
| Genotyping of Tos17 mutant rice                   | Tos17 OsPCS1 Fwd                     | TGCTCCCTACTCCCTAGCAA                                                          |
|                                                   | Tos17 OsPCS1 Rev                     | TGTGGCACAGGATCTCCATA                                                          |
|                                                   | Tos17 LB                             | ATTGTTAGGTTGCAAGTTAGTTAAGA                                                    |
| Genotyping of T-DNA mutant rice                   | T-DNA OsPCS1 Fwd                     | GCAAGTCCGTGATACTGAGC                                                          |
|                                                   | T-DNA OsPCS1 Rev                     | GGATTAATACAACAAACCTCTCG                                                       |
|                                                   | POSTECH T-DNA RB                     | GCACCGTGGTAGTAAGAATGG                                                         |
| RT-PCR of <i>OsPCS1</i>                           | OsPCS1full/a Fwd<br>OsPCS1 3'UTR Rev | GACTTCGGCCACCATCTC<br>CTTTTGAAGGACACCAGCC                                     |
| Real-time PCR of <i>OsPCSs</i>                    | OsPCS1full/a Fwd                     | GACTTCGGCCACCATCTC                                                            |
|                                                   | OsPCS1b/c Fwd                        | CATTGCATTGCATTTTCAGAC                                                         |
|                                                   | OsPCS1full/b Rev                     | CATCTCTGCAACTCACTGTG                                                          |
|                                                   | OsPCS1a/c Rev                        | GCAACTCTGCACAAAAGCAC                                                          |
|                                                   | OsPCS2 Fwd                           | ATGGCGTCTAAACCAAGCAG                                                          |
|                                                   | OsPCS2 Rev                           | CGGAGACGAGGCTGAAGAAC                                                          |
| Real-time PCR and RT-PCR of <i>OsUBQ5</i>         | OsUBQ5 Fwd<br>OsUBQ5 Rev             | GAAGGAGGAGGAAATCGAAC<br>CTTCACAGAGGTGATGCTAAGG                                |

Lowercase sequences indicate additional sequences for restriction enzyme digestion.

**Supplemental Table S2 Element concentrations and pH of the tested soil**

|                                                |    |               |
|------------------------------------------------|----|---------------|
| Element concentration (mg kg <sup>-1</sup> DW) | As | 0.73 ± 0.03   |
|                                                | Cd | 0.015 ± 0.001 |
|                                                | Fe | 26.9 ± 2.2    |
|                                                | Mn | 53.3 ± 2.4    |
|                                                | Cu | 2.06 ± 0.10   |
|                                                | Zn | 3.99 ± 0.08   |
| pH (H <sub>2</sub> O)                          |    | 4.83 ± 0.03   |

Data represent mean with SD of 4 replicates.
